# Ehrlichioses in Humans: Epidemiology, Clinical Presentation, Diagnosis, and Treatment

J. Stephen Dumler,<sup>1</sup> John E. Madigan,<sup>2</sup> Nicola Pusterla,<sup>2</sup> and Johan S. Bakken<sup>3,4</sup>

<sup>1</sup>Division of Medical Microbiology, Department of Pathology, The Johns Hopkins University School of Medicine, Baltimore, Maryland; <sup>2</sup>Department of Medicine and Epidemiology, School of Veterinary Medicine, University of California, Davis; and <sup>3</sup>Department of Family Medicine, School of Medicine, University of Minnesota at Duluth, and <sup>4</sup>St. Luke's Infectious Disease Associates, St. Luke's Hospital, Duluth, Minnesota

Human ehrlichioses are emerging tickborne infections. "Human ehrlichiosis" describes infections with at least 5 separate obligate intracellular bacteria in 3 genera in the family Anaplasmataceae. Since 1986, these agents and infections (human monocytic ehrlichiosis [HME], caused by *Ehrlichia chaffeensis*; human granulocytic anaplasmosis [HGA], caused by *Anaplasma phagocytophilum*; and human ewingii ehrlichiosis, caused by *Ehrlichia ewingii*) are the causes of most human ehrlichioses. Their prevalence and incidence are increasing where the appropriate tick vectors are found. The diseases generally present as undifferentiated fever, but thrombocytopenia, leukopenia, and increased serum transaminase activities are important laboratory features. Despite clinical similarities, each disease has unique features: a greater severity and a higher case-fatality rate for HME and a higher prevalence of opportunistic infections for HGA. Once an ehrlichiosis is suspected on historical and clinical grounds, doxycycline treatment should be initiated concurrently with attempts at etiologic confirmation using laboratory methods such as blood smear examination, polymerase chain reaction, culture, and serologic tests.

"Ehrlichiosis" is a generic name for infections caused by obligate intracellular bacteria in the family Anaplasmataceae, chiefly in the genera *Ehrlichia* and *Anaplasma*. Human infections with organisms in this family were first recognized in 1953, with a species now classified as *Neorickettsia sennetsu*; in 1986, with an *Ehrlichia* species; and in 1990, with an *Anaplasma* species. The latter 2 genera now comprise the majority of human infections, which are caused by at least 3 distinct species: *Ehrlichia chaffeensis*, *Ehrlichia ewingii*, and *Anaplasma phagocytophilum*. The purpose of this review is to highlight changes in nomenclature and disease terminology and to compare and contrast the epidemiology, clinical manifestations, diagnosis, and treatment of these distinctive infections.

## HUMAN INFECTIONS CAUSED BY ANAPLASMATACEAE MEMBERS

Although 5 Anaplasmataceae members, including *A. phagocytophilum*, *E. chaffeensis*, *E. ewingii*, *Ehrlichia canis*, and *N. sennetsu*, infect humans, only the former 3 species are sufficiently investigated. Circulating leukocytes are their targets, and the corresponding diseases are often named according to the infected leukocyte appended by the bacterial genus; for example, *E. chaffeensis* infecting monocytes causes human monocytic ehrlichiosis (HME), and *A. phagocytophilum* infecting granulocytes causes human granulocytic anaplasmosis (HGA) [1, 2]. HGA was formerly called "human granulocytic ehrlichiosis," but taxonomic revisions within the Anaplasmataceae resulted in the name change [3]. The canine pathogen *E. ewingii* was recognized in 1998 to cause infections in humans [4]. *E. ewingii* is serologically similar to *E. chaffeensis* but, like *A. phagocytophilum*, propagates within neutrophils [4, 5]. To avoid confusion, it is preferable that human *E. ewingii* infection be called "human ewingii ehrlichiosis." Patients in regions where these infections exist who present during tick season with fever, leukopenia and/or thrombo-

Reprints or correspondence: Dr. J. Stephen Dumler, Div. of Medical Microbiology, Dept. of Pathology, The Johns Hopkins University School of Medicine, 720 Rutland Ave., Ross 624, Baltimore, MD 21205 (sdumler@jhmi.edu).

**Clinical Infectious Diseases** 2007;45:S45–51

© 2007 by the Infectious Diseases Society of America. All rights reserved.

1058-4838/2007/4502S1-0011\$15.00

DOI: 10.1086/518146

cytopenia, and increased serum transaminase activities should have ehrlichiosis included in the differential diagnosis. Unique clinical features and pathogenetic mechanisms are associated with each pathogen [1, 6, 7], and distinguishing infections by use of laboratory diagnostics is more than academic. Although clinical features cannot distinguish the causative agents, each responds to doxycycline therapy [7, 8].

## EPIDEMIOLOGY AND ECOLOGY

The agents of human ehrlichiosis are tickborne, and most infections occur during May through August. These infections are now reportable in the United States, and passively collected data provide some measure of their incidence and prevalence [9]. In 2005, more cases of ehrlichiosis were reported than ever before (figure 1), including 471 cases of HME (2396 cases since 1986) and 700 cases of HGA (2963 cases since 1994). However, these figures likely represent underestimates of the true incidence and prevalence, because active surveillance rates are as high as 330–414 cases per 100,000 population (0.3%–0.4%) for HME in Tennessee [10] and southeastern Missouri [11] and 24–58 cases per 100,000 population (0.02%–0.06%) for HGA in Connecticut [12] and the Upper Midwest [13]. Seroprevalence studies show rates of ~12.5% for HME in Tennessee [14]

and ~14.9% for HGA in northwestern Wisconsin [15]. HME occurs across the south-central, southeastern, and mid-Atlantic states, corresponding to regions where white-tailed deer (*Odocoileus virginianus*) and lone star ticks (*Amblyomma americanum*) both exist [5]. Although limited to the United States, *E. ewingii* can also be transmitted by *A. americanum* ticks and may be the more prevalent species in some regions.

In contrast, *A. phagocytophilum* infection occurs internationally, and areas of endemicity include the United States (northeastern and mid-Atlantic, Upper Midwest, and Pacific Northwest states), Europe, and Asia (China, Siberian Russia, and Korea) [6]. These regions correspond to areas where *Ixodes persulcatus* group ticks (*I. scapularis* in the eastern United States, *I. pacificus* in the western United States, *I. ricinus* in Europe, and *I. persulcatus* in Asia) bite humans. Small mammals, such as white-footed mice (*Peromyscus leucopus*); dusky-footed wood rats (*Neotoma fuscipes*); or others, such as *Apodemus*, *Microtus*, or *Clethrionomys* species are likely reservoirs [6]. A potential role for cervids as reservoirs has been demonstrated [1, 6], but their role as reservoirs must depend on parasitization by both mature and immature vector ticks, because tick transovarian transmission is inefficient. Owing to the shared tick vectors for *A. phagocytophilum*, *Borrelia burgdorferi*, *Babesia microti*, and

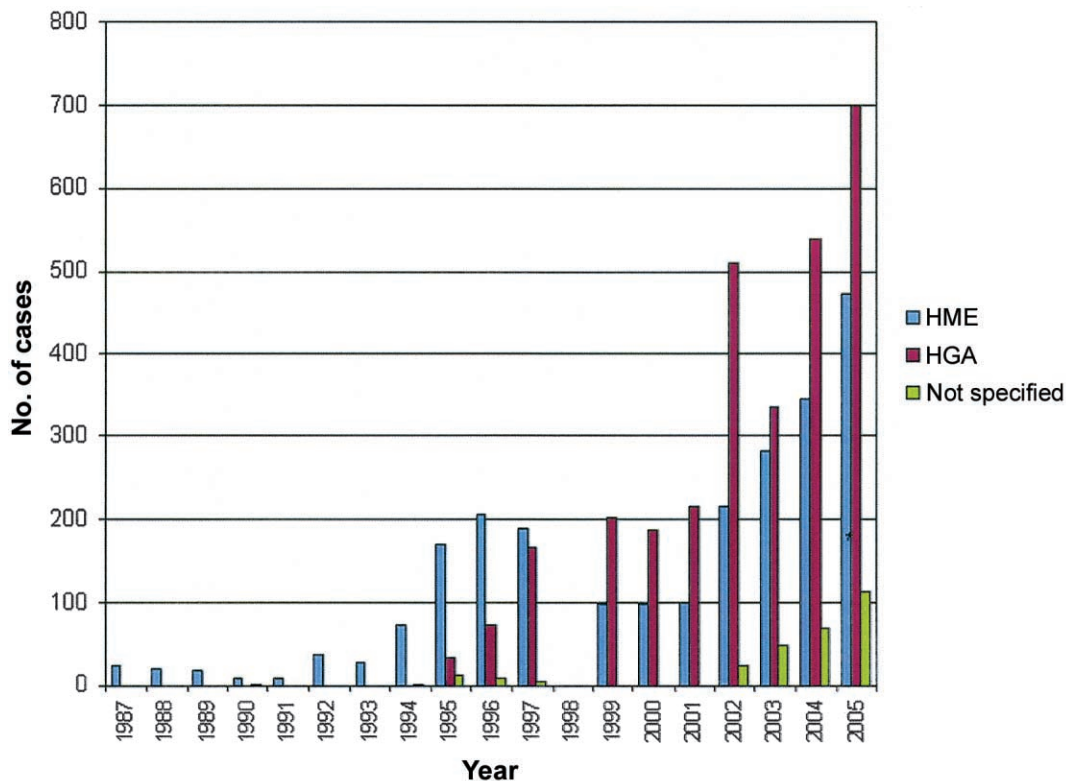

**Figure 1.** Cases of human monocytic ehrlichiosis (HME) and human granulocytic anaplasmosis (HGA) reported in the United States since 1986. The data reflect information available until January 2006; data for the year 1998 were unavailable.

**Table 1. Meta-analysis of human monocytic ehrlichiosis (HME) and human granulocytic anaplasmosis (HGA) symptoms, signs, and laboratory findings.**

| Symptom, sign, or finding       | Patients, %<br>(no. evaluated) |          |
|---------------------------------|--------------------------------|----------|
|                                 | HME                            | HGA      |
| Symptom or sign                 |                                |          |
| Fever                           | 97 (633)                       | 93 (521) |
| Myalgia                         | 57 (250)                       | 77 (516) |
| Headache                        | 80 (240)                       | 76 (385) |
| Malaise                         | 82 (234)                       | 94 (288) |
| Nausea                          | 64 (143)                       | 38 (258) |
| Vomiting                        | 33 (192)                       | 26 (90)  |
| Diarrhea                        | 23 (197)                       | 16 (95)  |
| Cough                           | 26 (155)                       | 19 (260) |
| Arthralgias                     | 41 (211)                       | 46 (504) |
| Rash                            | 31 (286)                       | 6 (357)  |
| Stiff neck                      | 3 (240)                        | 21 (24)  |
| Confusion                       | 19 (279)                       | 17 (211) |
| Laboratory finding              |                                |          |
| Leukopenia                      | 62 (276)                       | 49 (336) |
| Thrombocytopenia                | 71 (247)                       | 71 (336) |
| Elevated serum AST or ALT level | 83 (276)                       | 71 (177) |

**NOTE.** Data are from [1]. ALT, alanine aminotransferase; AST, aspartate aminotransferase.

tickborne encephalitis viruses, ~10% of patients have serologic evidence of coinfection, and cases of simultaneous Lyme disease or tickborne encephalitis are well documented [6].

### CLINICAL AND LABORATORY FINDINGS

HME and HGA are caused by distinct but related bacterial species that propagate in different host cells that are then altered in different ways [1, 6]. Paradoxically, all forms of human ehrlichiosis share many clinical and laboratory manifestations, including fever, headache, myalgia and malaise, thrombocytopenia, leukopenia, and indices of hepatic injury (table 1) [6, 7, 11]. Similarly, the median age of patients with either infection is ~50 years, and slightly more males (57%–61%) are infected than females [9]. Certain clinical features are unique to either HME or HGA, including rare CNS infections in HGA and the greater likelihood of rash in HME. Although clinically undifferentiated, identification of  $<100 \times 10^9$  platelets/L and  $<2.5 \times 10^9$  leukocytes/L is associated with a relative risk for HGA as high as 4.7–22.7 and 1.1–24.8, respectively. In contrast, leukocytosis ( $>10.2 \times 10^9$  cells/L) is associated with a low relative risk (0.10–0.71) for HGA [16]. The key to diagnosing HME or HGA is identification of fever (with or without evidence of other systemic findings) and thrombocytopenia, leukopenia, and elevated serum transaminase activities in a patient exposed in a tick-endemic region during times of tick activity.

The latter features increase the probability of infection, because they preselect at-risk populations. However, a lack of these historical, epidemiologic, or laboratory features should not exclude HME or HGA from consideration in suspected cases.

Complications of HME and HGA (table 2) are infrequent but may be evident at the time of presentation, appear within several days after onset, or, rarely, develop later and persist for long intervals in the absence of active infection [1, 6, 7, 17]. Important complications differ for HME and HGA. Patients with HME can develop a fulminant toxic or septic shock–like syndrome, particularly individuals with HIV infection or those with underlying immunocompromise (e.g., organ transplant recipients or patients undergoing immunosuppression for cancer or immune disorders) [18]. Such presentations are less frequent with HGA [9]. Similarly, ~20% of patients with HME have evidence of CNS involvement (meningitis or meningoencephalitis), findings not easily corroborated in patients with HGA [1, 7]. In contrast, peripheral neuropathies, including brachial plexopathy, demyelinating polyneuropathy, and even

**Table 2. Clinical complications and risk factors for complications in human monocytic ehrlichiosis (HME) and human granulocytic anaplasmosis (HGA).**

| Clinical complication or risk factor                  | HME | HGA   |
|-------------------------------------------------------|-----|-------|
| Hospitalization                                       | 42  | 33–50 |
| Intensive care unit admission                         | ND  | 7     |
| Life-threatening complications                        | 17  | 7     |
| Death                                                 | 3   | <1    |
| Hemodynamic system complications                      |     |       |
| Toxic or septic shock–like syndrome                   | ++  | +     |
| Coagulopathy                                          | 2   | <1    |
| Hemorrhage                                            | +   | ±     |
| Myocarditis or heart failure                          | +   | ±     |
| Renal failure                                         | 2   | 1     |
| Pneumonia/ARDS                                        | 1   | 1     |
| CNS and PNS complications                             |     |       |
| Meningoencephalitis                                   | 4   | 1     |
| Cranial nerve palsies                                 | ±   | ±     |
| Demyelinating polyneuropathy                          | NR  | ±     |
| Brachial plexopathy                                   | NR  | ±     |
| Acute abdominal syndrome                              | +   | NR    |
| Rhabdomyolysis                                        | NR  | ±     |
| Opportunistic infections                              | +   | ++    |
| Predisposing conditions                               |     |       |
| Increased severity with preexisting disease           | ++  | ++    |
| Underlying immunosuppressive condition                | 12  | 6     |
| Fulminant infections in immunocompromised individuals | ++  | ±     |

**NOTE.** Data are percentages of identified patients with each clinical complication, unless otherwise indicated, and are from [2, 5, 9, 17, 18]. ++, reported in >5 publications or cases; +, reported several times; ±, reported at least once; ARDS, acute respiratory distress syndrome; ND, not determined; NR, not reported; PNS, peripheral nervous system.

isolated facial palsy, are more common with HGA and can persist for weeks or months [6]. Respiratory distress syndrome is best documented in HME, although it may also occur in HGA [1, 5]. Although persons with underlying immunosuppression—for example, as a result of kidney transplantation or HIV infection—are at higher risk for human ewingii ehrlichiosis, far fewer complications and no fatalities have been reported, in comparison with HME and HGA [18]. Fatalities due to HME occur in ~3% of infections, most commonly in immunosuppressed persons with respiratory distress syndrome, hepatitis, or opportunistic nosocomial infections [1, 5, 9]. The case-fatality rate is lower for HGA (0.7%) and largely relates to complicating opportunistic infections, although poor outcomes are also associated with antecedent medical conditions, such as diabetes mellitus [2].

## DIAGNOSIS

Because human ehrlichiosis can be rapidly progressive and fatal, doxycycline treatment should be initiated promptly once an empirical clinical diagnosis has been rendered, even in the absence of a confirmatory laboratory test. There are several approaches to laboratory confirmation of ehrlichiosis that should be applied at different intervals after the onset of illness (table 3).

**Examination of peripheral blood smears.** Examination of a Wright-stained peripheral blood smear for intracytoplasmic inclusions (morulae, Latin for “mulberry”), which may be seen as stippled blue inclusions of bacteria in monocytes (HME) or neutrophils or bands (HGA), is the most rapid diagnostic method that can be used after disease onset (figure 2). This is a relatively insensitive assay for HME, in which generally <10%

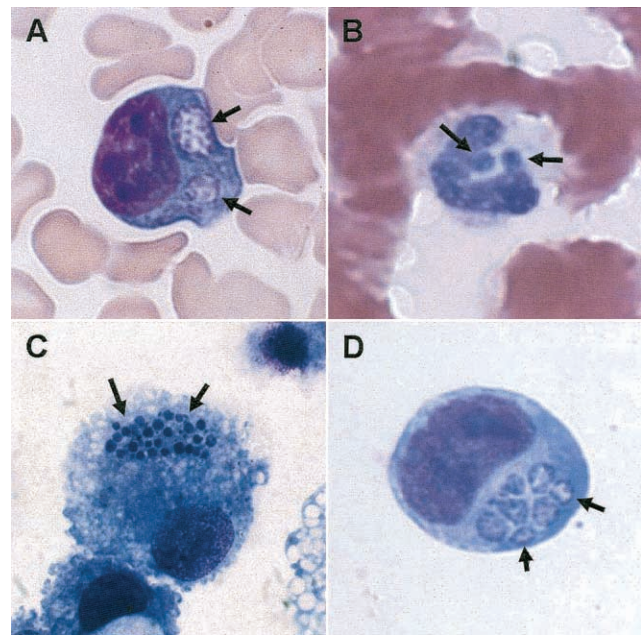

**Figure 2.** *Ehrlichia chaffeensis* (A and C; Wright stain) and *Anaplasma phagocytophilum* (B and D; Hema-3 stain) morulae (arrows) in peripheral blood monocytes (A), peripheral blood neutrophils (B), DH82 canine histiocytic cell culture (C), and human HL-60 promyelocytic cell culture (D). Original magnification,  $\times 260$ . (Panel A courtesy of A. Marty.)

of infected patients will have these structures identified at presentation [10]. Blood smear evaluation is more useful for HGA diagnosis, because 25%–75% of reported cases in the United States have morulae in peripheral blood examinations, and sensitivity is highest during the first week of infection [2, 16]. Doxycycline treatment adversely affects sensitivity for detection of both *E. chaffeensis* and *A. phagocytophilum* by blood smear examination [19].

**Molecular diagnosis by PCR.** PCR performed using EDTA- or citrate-anticoagulated blood is rapidly becoming the diagnostic test of choice at or shortly after presentation. PCR obviates the need for culture, and the timeliness of results is of great value to the treating physicians. PCR detection sensitivity is relatively high; it is reported to range between 60% and 85% for *E. chaffeensis* infection [10, 11] and between 67% and 90% for *A. phagocytophilum* infection [2, 19]. PCR is the only definitive diagnostic test for *E. ewingii* infection, although the sensitivity and specificity of this approach are unknown [4, 18]. Recent advances in molecular methods promise even greater analytical sensitivity, and multiplex testing that could identify several agents of ehrlichiosis from a single test has been described elsewhere [20, 21]. As for blood smear microscopy, PCR sensitivity is also adversely affected by antecedent doxycycline treatment; therefore, blood samples should be obtained before or at the initiation of therapy, although treatment should not

**Table 3. Diagnostic tests for human monocytic ehrlichiosis (HME) and human granulocytic anaplasmosis (HGA), by time interval after onset of clinical illness.**

| Weeks after onset, diagnostic test | Sensitivity, %               |                 |
|------------------------------------|------------------------------|-----------------|
|                                    | HME                          | HGA             |
| $\leq 1$                           |                              |                 |
| Blood smear evaluation             | 2–38                         | 25–75           |
| PCR                                | 60–85                        | 67–90           |
| Culture                            | Highly variable <sup>a</sup> | $\geq 55^b$     |
| Serologic testing                  | 22–55 (IgM, $\leq 44$ )      | 24–44 (IgM, 33) |
| 1–2                                |                              |                 |
| Blood smear evaluation             | Unknown                      | 63              |
| PCR                                | Unknown                      | 68              |
| Culture                            | Unknown                      | 33              |
| Serologic testing                  | 68                           | 91              |
| $\geq 3$                           |                              |                 |
| Serologic testing                  | $\geq 90$                    | $\geq 95$       |

<sup>a</sup> May require weeks of incubation.

<sup>b</sup> May require weeks of incubation; results are often positive within 2 weeks.

**Table 4. Currently recommended therapeutic regimens for human monocytic ehrlichiosis (HME) and human granulocytic anaplasmosis (HGA).**

| Antibiotic                 | Dosage                     |                                       | Treatment duration <sup>a</sup> |
|----------------------------|----------------------------|---------------------------------------|---------------------------------|
|                            | Adult                      | Pediatric                             |                                 |
| Doxycycline hyclate        | 100 mg iv or po every 12 h | 2.2 mg/kg po every 12 h               | 5–14 days                       |
| Tetracycline hydrochloride | 500 mg po every 6 h        | 25–50 mg/kg/day po in 4 divided doses | 5–14 days                       |
| Rifampin <sup>b</sup>      | 300 mg po every 12 h       | 10 mg/kg po every 12 h                | 7–10 days                       |

**NOTE.** Data are from [8]. Antibiotic treatment is not recommended for seropositive patients who are asymptomatic or who lack the typical manifestations of HME or HGA. iv, intravenously; po, by mouth.

<sup>a</sup> Antibiotic therapy should be continued for 3–5 days after fever subsides.

<sup>b</sup> Rifampin is recommended only for patients with contraindications to doxycycline or tetracycline therapy (e.g., allergy and pregnancy).

be withheld while waiting for either samples or a laboratory result.

**In vitro cultivation.** Another diagnostic alternative is the recovery of either *E. chaffeensis* or *A. phagocytophilum* in culture from blood or CSF (*E. chaffeensis* only) [10, 22]. Unfortunately, *E. ewingii* has not yet been cultivated in vitro. The major pitfall associated with cultivation is that there is only a small number of competent laboratories, because this technique requires the application of unique antibiotic-free cell culture methods not typically available in clinical laboratories. Although both pathogens are able to grow in several different cell lines, *E. chaffeensis* is most often isolated by inoculation of mononuclear leukocytes from density gradients into the DH82 canine histiocytic cell line [10, 18]. Cultures are monitored 2–3 times weekly for several weeks by sampling cells in the supernatant and staining with a rapid Romanowsky method, such as Diff-Quik. Small clusters of tiny bacteria aggregate inside of intracytoplasmic vacuoles to form morulae (figure 2). Individual cells can contain multiple morulae in culture, although this is infrequent in vivo. Typically, cultures require 2–6 weeks of incubation before infected cells are detected.

Similarly, *A. phagocytophilum* can be recovered by culture of leukocyte fractions or whole EDTA-treated blood on human promyelocytic HL-60 cells [22]. The sensitivity of culture for detection of *A. phagocytophilum* can be equivalent to that of PCR and blood smear examination [2, 16, 19]; however, positive culture results are usually not obtained before ~1 week and can remain negative for  $\geq 2$  weeks. Cultures are monitored similarly to the way in which those of *E. chaffeensis* are monitored, and the morulae have a very similar appearance (figure 2). Prior doxycycline treatment diminishes the sensitivity of culture to a greater degree than it does for PCR or blood smear examination.

**Serodiagnosis.** The most sensitive method of diagnostic confirmation of either HME or HGA is the detection of a seroconversion or 4-fold change in antibody titer during the convalescent phase [2, 11, 13, 17, 23]. The most frequently

applied serologic test is based on fluorescent detection of antibodies reactive with whole *E. chaffeensis*– or *A. phagocytophilum*–infected tissue culture cells or purified bacteria fixed to glass slides. Polyvalent antibody detection provides sensitivity rates of 88%–90% for HME [11, 24] and 82%–100% for HGA [25]; for IgM, sensitivity ranges from 44% for *E. chaffeensis* [11] to 27%–37% for *A. phagocytophilum* [25]. Specificity studies have been conducted only for *A. phagocytophilum*, for which specificity has been found to range from 83% to 100% [25]. Most nonspecificity results from cross-reactivity among *E. chaffeensis* and *A. phagocytophilum* antibodies, such that testing for both pathogens is warranted for suspected cases [25].

There are several potential problems with serologic diagnosis that can obfuscate the interpretation of a positive test result. Factors to consider include the following: (1) IgG antibodies may persist for months to years after infection in the absence of relapse or persistent clinical manifestations [23, 24]; (2) high seroprevalence rates exist in some regions, even among individuals with no clinical evidence of infection [15, 26, 27]; and (3) analysis of a single acute-phase serum sample may result in the detection of as few as 3% of patients with HGA and HME [11, 23]. These shortcomings can be minimized by emphasizing the use of antibody tests for patients with characteristic clinical manifestations, to improve predictive value, and by comparing acute- and convalescent-phase titers against both *E. chaffeensis* and *A. phagocytophilum* [25]. Thus, a serologic reaction in a patient lacking typical clinical findings should not be interpreted as representing active, persistent, chronic, or even dormant infection [23]. On the basis of the published performance characteristics of the fluorescent antibody test for HGA using convalescent-phase serum (mean sensitivity, 89.9%; mean specificity, 99.2%) [25], the posttest positive predictive value under conditions of low (4%) prevalence or pretest probability is still 82%; this value increases to >96% when prevalence or pretest probability increases to 25%. Likewise, the negative predictive value of the HGA immunofluorescent assay is 91% and 97%

when the pretest probability of infection is 50% and 25%, respectively. Regardless, a number of conditions are associated with false-positive serologic test results, including Rocky Mountain spotted fever, typhus, Q fever, brucellosis, Lyme disease, Epstein-Barr virus infection, and autoimmune conditions that yield autoantibodies (rheumatoid factor, antinuclear antibodies, antineutrophil cytoplasmic antibodies, and antiplatelet antibodies).

## TREATMENT

Although no clinical trials have been conducted, empirical data show that all forms of ehrlichiosis respond to tetracyclines [8]. Currently recommended regimens are shown in table 4. Response is generally very rapid, with improvement evident within 24–48 h, although this can be prolonged in those for whom a significant treatment delay has occurred. Doxycycline is preferred over tetracycline because of its twice-daily oral dosing, better patient tolerance, and the relatively lower risk of adverse drug effects for children <8 years of age. There is excellent in vitro susceptibility data to support the clinical impression of tetracycline efficacy for both *E. chaffeensis* and *A. phagocytophilum* infection [8, 28, 29]. Doxycycline is also the drug of choice for children <8 years of age who are seriously ill [8]. For situations in which doxycycline is contraindicated (e.g., allergy and pregnancy), few data support alternative regimens.  $\beta$ -Lactams, cephalosporins, macrolides, and aminoglycosides are inactive against *E. chaffeensis* and *A. phagocytophilum* in vitro, and there is no evidence for in vivo efficacy of these drugs. Despite some reports of clinical response to chloramphenicol, in vitro MICs discourage its use for treatment of HME or HGA [8]. Similarly, levofloxacin and other fluoroquinolones have variably acceptable MICs for *A. phagocytophilum* in vitro, but limited clinical applications suggest that they are not effective for HME and may not be effective for HGA [8]. Some empiric clinical success has also been reported for rifampin [30], the usefulness of which is supported by low MICs in vitro [8, 28].

Doxycycline therapy is highly efficacious, and posttherapy relapse has never been reported [8]. When there is objective evidence of concurrent HGA and Lyme disease, doxycycline can be used to treat both infections in adults. For children <8 years of age who are not seriously ill, the recommended approach is doxycycline treatment for 3 days after the patient's fever has abated, followed by treatment with another antibiotic (e.g., amoxicillin) that is active against *B. burgdorferi* to complete a full 14-day course of therapy. Individuals treated in this manner should be followed closely to ascertain that HGA has completely resolved.

## Acknowledgments

Personal note from J.S.D.: This article is dedicated to the memory of Dr. Theodore E. Woodward, who was Professor Emeritus of Medicine during my tenure as a medical student at the University of Maryland School of Medicine, Baltimore. My interactions with him at this time were instrumental in focusing me toward an academic career in medicine and rickettsiology. I will always be grateful for his teaching, kind encouragement, wit, and generosity, and for his recollections of interesting infectious diseases cases and pioneer investigators, as well as his humorous anecdotes.

**Financial support.** National Institute of Allergy and Infectious Diseases (grants R01 AI41213, R01 AI44102, and R21 NS050711).

**Supplement sponsorship.** This article was published as part of a supplement entitled "Tribute to Ted Woodward," sponsored by an unrestricted grant from Cubist Pharmaceuticals and a donation from John G. McCormick of McCormick & Company, Hunt Valley, Maryland.

**Potential conflicts of interest.** All authors: no conflicts.

## References

1. Dumler JS. *Anaplasma* and *Ehrlichia* infection. *Ann N Y Acad Sci* **2005**;1063:361–73.
2. Bakken JS, Dumler JS. Human granulocytic ehrlichiosis. *Clin Infect Dis* **2000**;31:554–60.
3. Dumler JS, Barbet AF, Bekker CP, et al. Reorganization of genera in the families *Rickettsiaceae* and *Anaplasmataceae* in the order *Rickettsiales*: unification of some species of *Ehrlichia* with *Anaplasma*, *Cowdria* with *Ehrlichia* and *Ehrlichia* with *Neorickettsia*, descriptions of six new species combinations and designation of *Ehrlichia equi* and 'HGE agent' as subjective synonyms of *Ehrlichia phagocytophila*. *Int J Syst Evol Microbiol* **2001**;51:2145–65.
4. Buller RS, Arens M, Hmiel SP, et al. *Ehrlichia ewingii*, a newly recognized agent of human ehrlichiosis. *N Engl J Med* **1999**;341:148–55.
5. Paddock CD, Childs JE. *Ehrlichia chaffeensis*: a prototypical emerging pathogen. *Clin Microbiol Rev* **2003**;16:37–64.
6. Dumler JS, Choi KS, Garcia-Garcia JC, et al. Human granulocytic anaplasmosis and *Anaplasma phagocytophilum*. *Emerg Infect Dis* **2005**;11:1828–34.
7. Stone JH, Dierberg K, Aram G, Dumler JS. Human monocytic ehrlichiosis. *JAMA* **2004**;292:2263–70.
8. Bakken JS, Dumler JS. *Ehrlichia* and *Anaplasma* species. In: Yu V, Weber R, Raoult D, eds. *Antimicrobial therapy and vaccines*. 2nd ed. New York: Apple Trees Productions, **2002**:875–82.
9. Demma LJ, Holman RC, McQuiston JH, Krebs JW, Swerdlow DL. Epidemiology of human ehrlichiosis and anaplasmosis in the United States, 2001–2002. *Am J Trop Med Hyg* **2005**;73:400–9.
10. Standaert SM, Yu T, Scott MA, et al. Primary isolation of *Ehrlichia chaffeensis* from patients with febrile illnesses: clinical and molecular characteristics. *J Infect Dis* **2000**;181:1082–8.
11. Olano JP, Masters E, Hogrefe W, Walker DH. Human monocytotropic ehrlichiosis, Missouri. *Emerg Infect Dis* **2003**;9:1579–86.
12. Ijdo JW, Meek JI, Cartter ML, et al. The emergence of another tickborne infection in the 12-town area around Lyme, Connecticut: human granulocytic ehrlichiosis. *J Infect Dis* **2000**;181:1388–93.
13. Bakken JS, Krueth J, Wilson-Nordskog C, Tilden RL, Asanovich K, Dumler JS. Clinical and laboratory characteristics of human granulocytic ehrlichiosis. *JAMA* **1996**;275:199–205.
14. Standaert SM, Dawson JE, Schaffner W, et al. Ehrlichiosis in a golf-oriented retirement community. *N Engl J Med* **1995**;333:420–5.
15. Bakken JS, Goellner P, Van Etten M, et al. Seroprevalence of human granulocytic ehrlichiosis among permanent residents of northwestern Wisconsin. *Clin Infect Dis* **1998**;27:1491–6.
16. Bakken JS, Aguero-Rosenfeld ME, Tilden RL, et al. Serial measurements of hematologic counts during the active phase of human granulocytic ehrlichiosis. *Clin Infect Dis* **2001**;32:862–70.

17. Olano JP, Walker DH. Human ehrlichioses. *Med Clin North Am* **2002**; 86:375–92.
18. Paddock CD, Folk SM, Shore GM, et al. Infections with *Ehrlichia chaffeensis* and *Ehrlichia ewingii* in persons coinfecting with human immunodeficiency virus. *Clin Infect Dis* **2001**; 33:1586–94.
19. Horowitz HW, Aguero-Rosenfeld ME, McKenna DF, et al. Clinical and laboratory spectrum of culture-proven human granulocytic ehrlichiosis: comparison with culture-negative cases. *Clin Infect Dis* **1998**; 27:1314–7.
20. Doyle CK, Labruna MB, Breitschwerdt EB, et al. Detection of medically important *Ehrlichia* by quantitative multicolor TaqMan real-time polymerase chain reaction of the dsb gene. *J Mol Diagn* **2005**; 7:504–10.
21. Sirigireddy KR, Ganta RR. Multiplex detection of *Ehrlichia* and *Anaplasma* species pathogens in peripheral blood by real-time reverse transcriptase-polymerase chain reaction. *J Mol Diagn* **2005**; 7:308–16.
22. Goodman JL, Nelson C, Vitale B, et al. Direct cultivation of the causative agent of human granulocytic ehrlichiosis. *N Engl J Med* **1996**; 334:209–15.
23. Bakken JS, Haller I, Riddell D, Walls JJ, Dumler JS. The serological response of patients infected with the agent of human granulocytic ehrlichiosis. *Clin Infect Dis* **2002**; 34:22–7.
24. Dawson JE, Fishbein DB, Eng TR, Redus MA, Green NR. Diagnosis of human ehrlichiosis with the indirect fluorescent antibody test: kinetics and specificity. *J Infect Dis* **1990**; 162:91–5.
25. Walls JJ, Aguero-Rosenfeld M, Bakken JS, et al. Inter- and intralaboratory comparison of *Ehrlichia equi* and human granulocytic ehrlichiosis (HGE) agent strains for serodiagnosis of HGE by the immunofluorescent-antibody test. *J Clin Microbiol* **1999**; 37:2968–73.
26. Aguero-Rosenfeld ME, Donnarumma L, Zentmaier L, et al. Seroprevalence of antibodies that react with *Anaplasma phagocytophila*, the agent of human granulocytic ehrlichiosis, in different populations in Westchester County, New York. *J Clin Microbiol* **2002**; 40:2612–5.
27. Marshall GS, Jacobs RF, Schutze GE, et al. *Ehrlichia chaffeensis* seroprevalence among children in the southeast and south-central regions of the United States. *Arch Pediatr Adolesc Med* **2002**; 156:166–70.
28. Maurin M, Bakken JS, Dumler JS. Antibiotic susceptibilities of *Anaplasma (Ehrlichia) phagocytophilum* strains from various geographic areas in the United States. *Antimicrob Agents Chemother* **2003**; 47:413–5.
29. Brouqui P, Raoult D. In vitro antibiotic susceptibility of the newly recognized agent of ehrlichiosis in humans, *Ehrlichia chaffeensis*. *Antimicrob Agents Chemother* **1992**; 36:2799–803.
30. Krause PJ, Corrow CL, Bakken JS. Successful treatment of human granulocytic ehrlichiosis in children using rifampin. *Pediatrics* **2003**; 112:e252–3.
